# Supplementary figures and images for: Switchable 3-0 magnetoelectric nanocomposite thin film with high coupling
Source: Royal Society of Chemistry journal article supplement (doi:10.1039/c6nr08674h), 2017-01-01

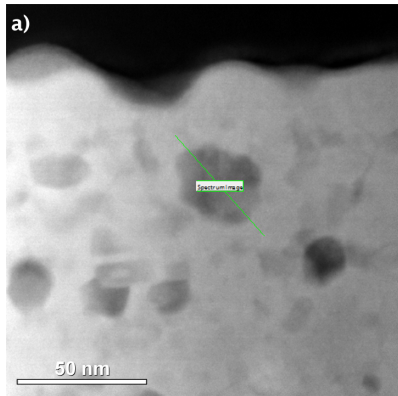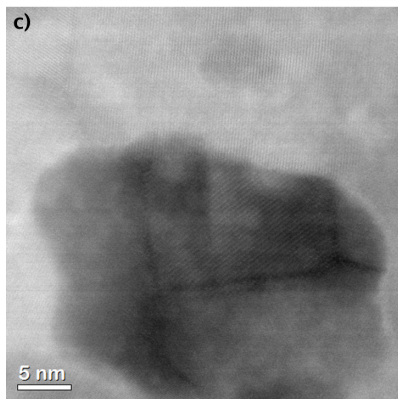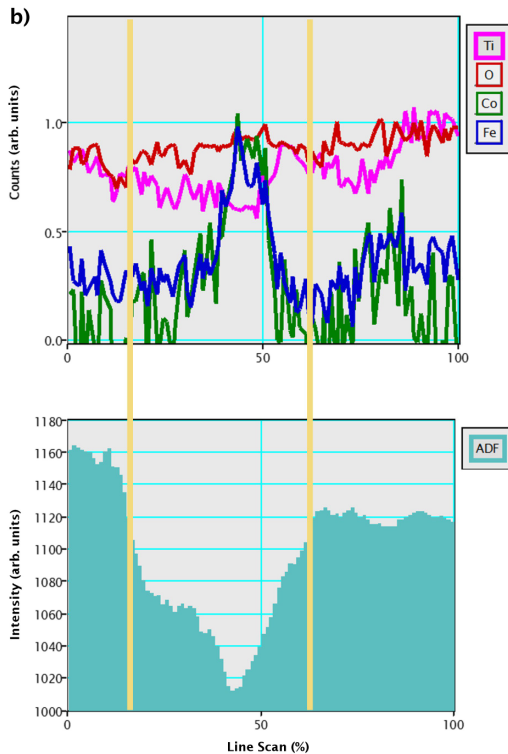

Supplement: c6nr08674h1.pdf [file c6nr08674h1.pdf]
